# Supplementary material for: In situ construction of a Sillén–Aurivillius layered perovskite-based 0D/2D homologous Schottky junction for efficient piezo-photocatalytic activity
Source: Royal Society of Chemistry journal article supplement (doi:10.1039/d3cy00876b), 2023-01-01
Supplement: d3cy00876b1.pdf [file d3cy00876b1.pdf]

## Supporting Information

### **In situ construction of Sillén-Aurivillius layered perovskite based 0D/2D homologous Schottky junction for efficient piezo-photocatalytic activity**

*Jian Yang, Yali Xue, Chuang Han, Xiaorui Zhang, Ke Sa, Jin Jia, Hanlin Ye, Yujun  
Liang \**

*Engineering Research Center of Nano-Geomaterials of Ministry of Education, Faculty of  
Materials Science and Chemistry, China University of Geosciences, Wuhan 430074,  
China.*

**\*Corresponding author:** Tel.: +86 27 67884814; fax: +86 27 67883733.

E-mail address: [yujunliang@sohu.com](mailto:yujunliang@sohu.com) (Yujun Liang)

## 1. Characterization methods

X-ray powder diffraction (XRD) patterns of the as-prepared samples were measured in the range 10-70° (2 $\theta$ ) on an X-ray diffractometer (D8-FOCUS, Bruker, Germany) operating with Cu K $\alpha$  radiation ( $\lambda = 1.5418 \text{ \AA}$ ). The morphologies of the as-prepared samples were analyzed by field emission scanning electron microscope (FE-SEM, SU8010, Hitachi, Japan) and transmission electron microscope (TEM, Tecnai G2 T20, FEI, America). Meanwhile, the energy-dispersive X-ray spectroscopy (EDS) spectra and elemental mapping images were recorded on an EDAX Genesis, which was attached to the FE-SEM. X-ray photoelectron spectroscopy (XPS) data were acquired on a Thermo Fisher Scientific equipped with an Al K $\alpha$  as the excitation source. The UV-vis diffuse reflectance spectra (DRS) were performed on an UV-2550PC spectrophotometer (Shimadzu Corporation, Japan). The photoluminescence (PL) spectra were conducted on a fluorescence spectrometer (Fluoromax-4P, Horiba Jobin Yvon, New Jersey, USA), which was equipped with a 150 W xenon lamp as the excitation source. The photoluminescence decay curves were examined by a Fluorescence Spectrometer (FLS 920, Edinburgh Instruments, Livingston, UK). The degradation products were identified by High Performance Liquid Chromatography-Mass Spectrometry (HPLC-MS, Agilent 1290uplc/qtof6550-MS).

## **2. Electrochemical measurements**

The photocurrent response spectroscopy, electrochemical impedance spectroscopy (EIS) and Mott-Schottky plots were collected on a standard three-electrode electrochemical analyzer (CHI760E, Shanghai). The as-prepared sample coated onto the FTO electrode was served as the working electrode, an Ag/AgCl (saturated KCl) as the reference electrode, and a Pt foil as the counter electrode. The Na<sub>2</sub>SO<sub>4</sub> (0.1 M) solution and 300 W Xe lamp (with a 420 nm optical filter) were employed as electrolyte and light source, respectively. The working electrodes were prepared according to the following method: 5 mg of photocatalyst powder and 10 μL of Nafion solution (5 wt%) were dispersed into 1 mL ethanol, and then ultrasonic treatment for 1 h to prepare a homogeneous catalyst colloid. Finally, the resultant catalyst slurry was coated onto the precleaned FTO glass surface with an active area of ca. 1.00 cm × 1.00 cm and then dried in air.

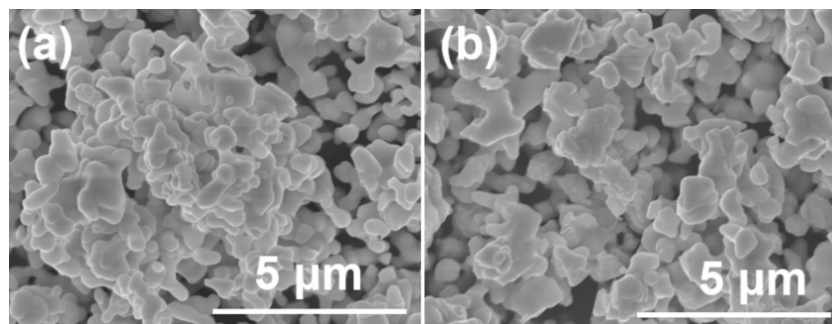

**Fig. S1.** SEM images of (a) BTOC-B and (b) BTOB-B.

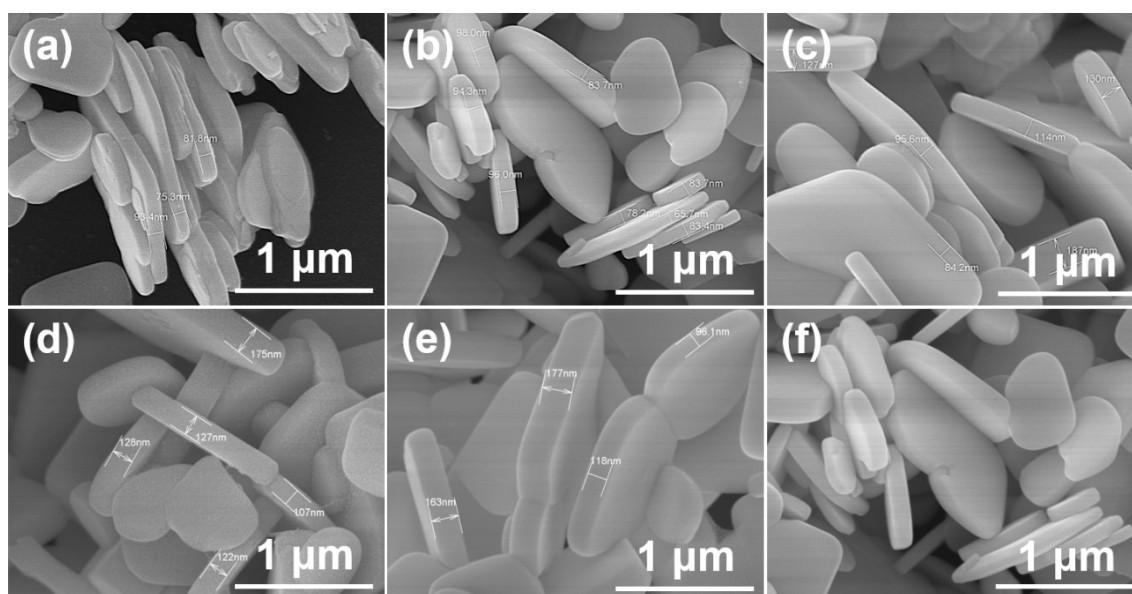

**Fig. S2.** SEM images of  $\text{Bi}_4\text{TaO}_8\text{Cl}_x\text{Br}_{1-x}$  solid solution: (a)  $x = 1$ , (b)  $x = 0.75$ , (c, f)  $x = 0.5$ , (d)  $x = 0.25$  and (e)  $x = 0$ .

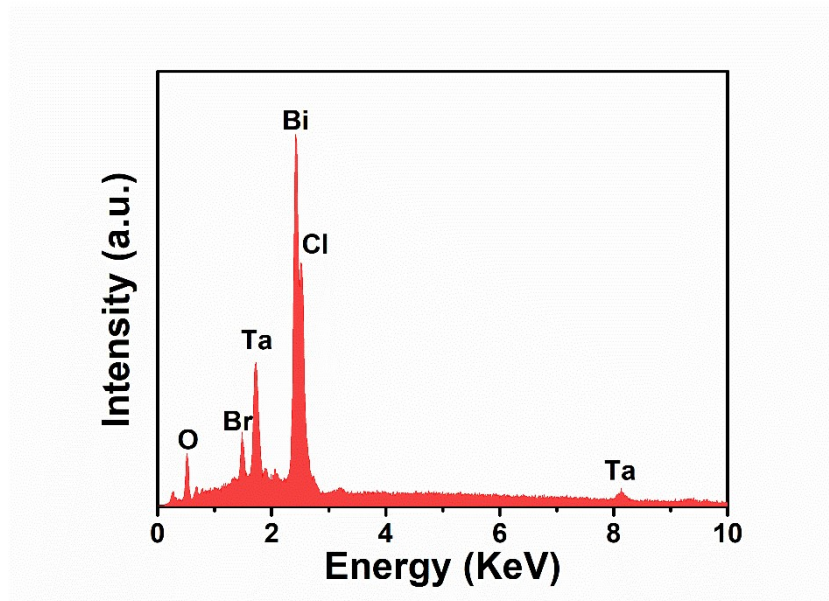

Fig. S3. EDS spectrum of Bi/BTOCB.

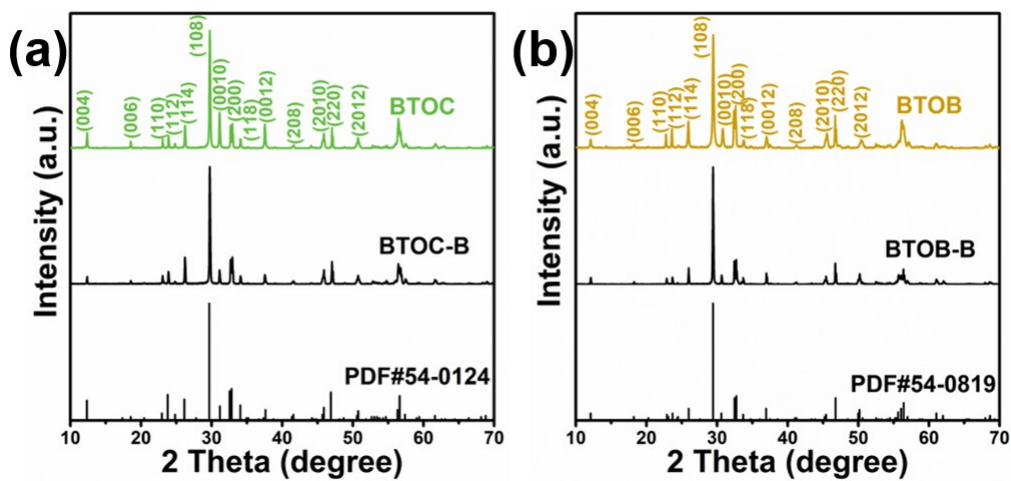

Fig. S4. XRD patterns of BTOC, BTOC-B, BTOB, and BTOB-B.

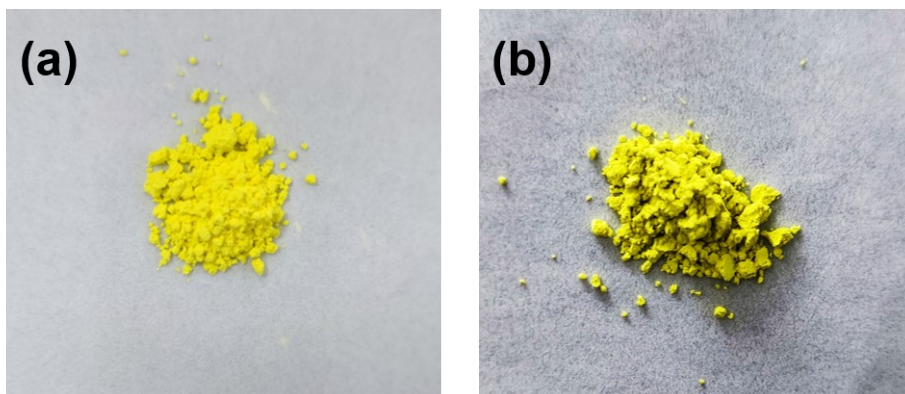

Fig. S5. The digital photographs of (a) BTOCB and (b) Bi/BTOCB.

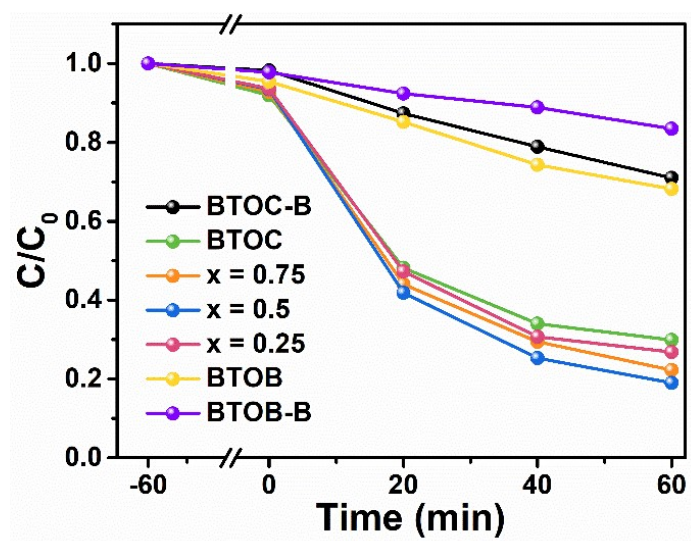

Fig. S6. The photocatalytic performance of the as-prepared samples for TC degradation.

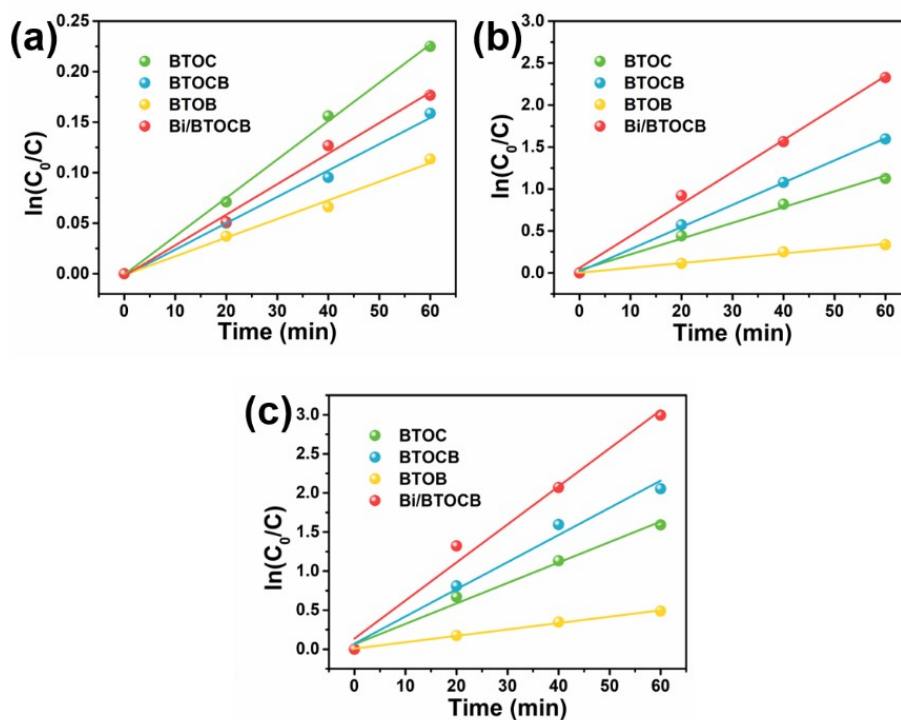

**Fig. S7.** The pseudo-first-order kinetics curves for degradation of TC over the as-prepared samples. (a) piezocatalytic, (b) photocatalytic, and (c) piezo-photocatalytic.

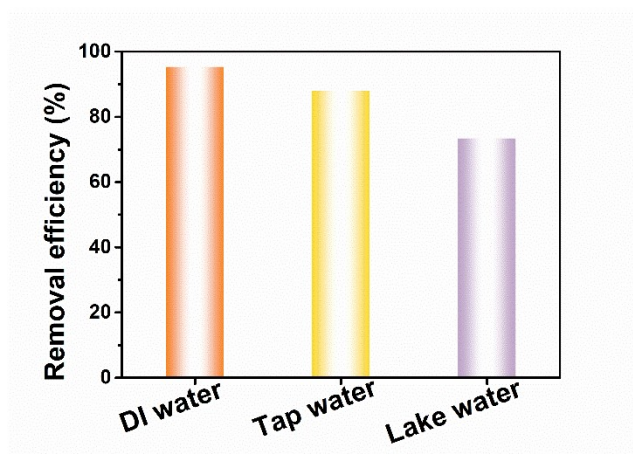

**Fig. S8.** Effect of different water bodies on the piezo-photodegradation of TC over Bi/BTOCB.

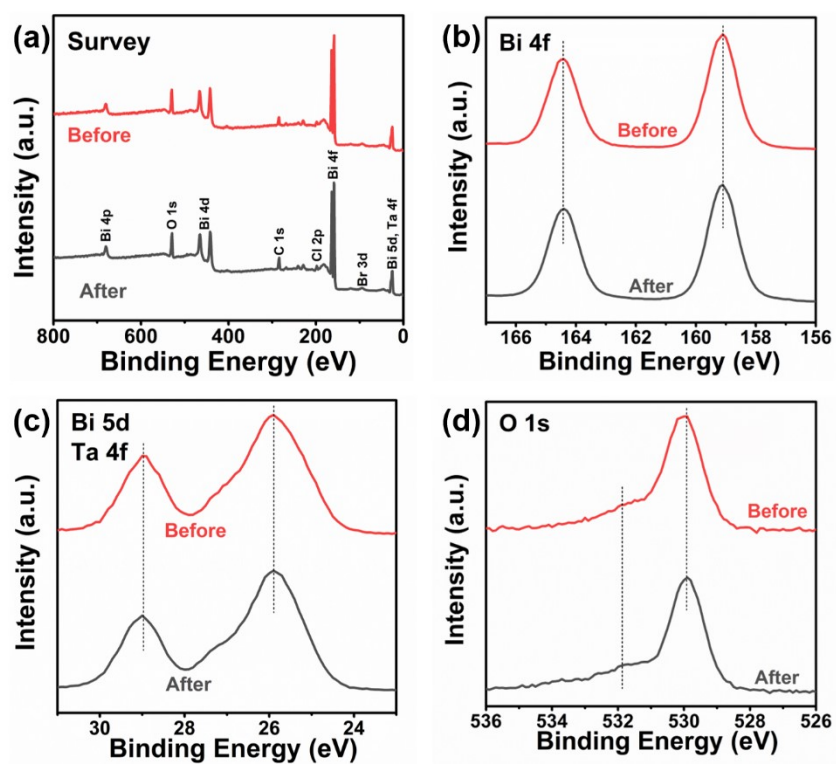

**Fig. S9.** XPS spectra before and after six cycles of Bi/BTOCB for piezo-photocatalytic reaction.

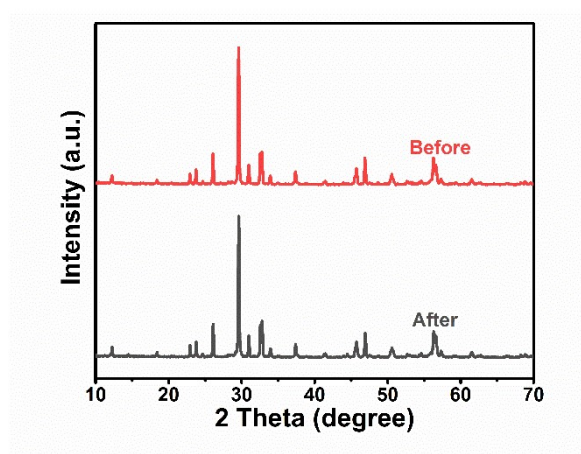

**Fig. S10.** XRD patterns before and after six cycles of Bi/BTOCB for piezo-photocatalytic reaction.



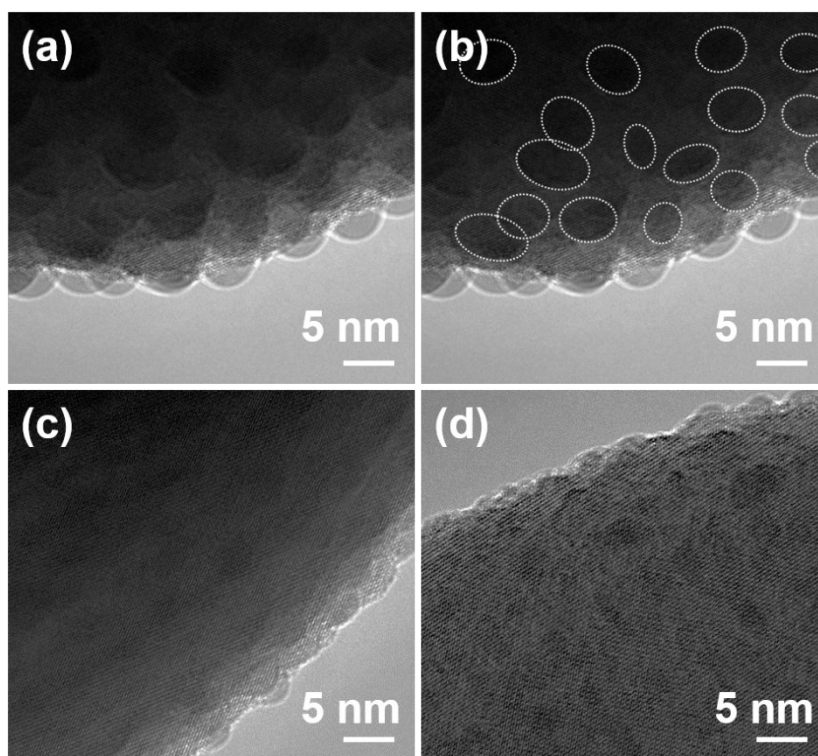

**Fig. S11.** TEM images before (a, b) and after (c, d) six cycles of Bi/BTOCB for piezophotocatalytic reaction.

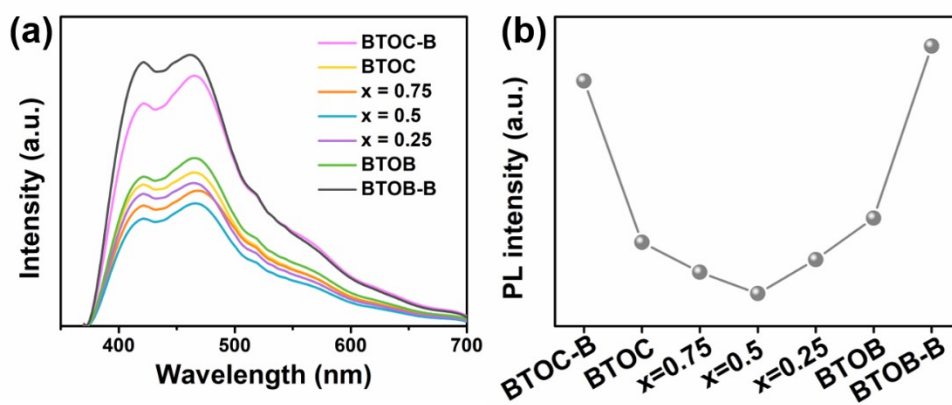

**Fig. S12.** PL spectra of as-prepared samples.

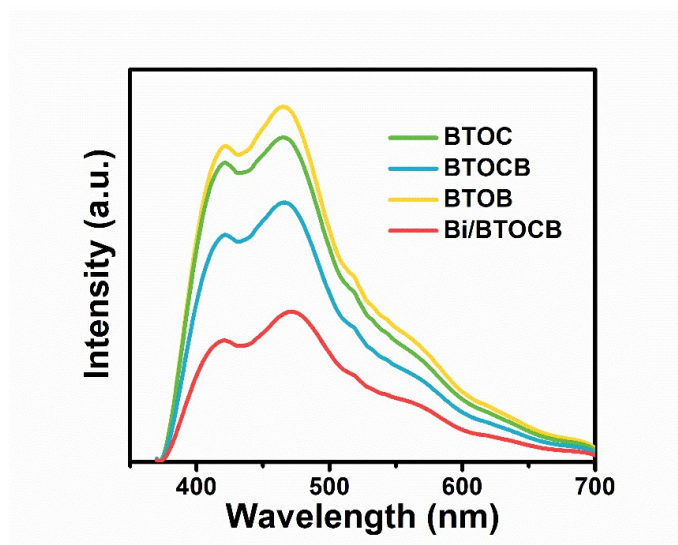

Fig. S13. PL spectra of BTOC, BTOCB, BTOB and Bi/BTOCB.

Table S1. Elemental composition of BTOCB (Atomic %) by EDS and XPS.

|     | Bi   | Ta  | O    | Cl  | Br  |
|-----|------|-----|------|-----|-----|
| EDS | 30.5 | 7.4 | 55.2 | 3.6 | 3.3 |
| XPS | 26.5 | 7.7 | 58.7 | 3.7 | 3.4 |

Table S2. Integrated areas of individuals XPS peaks of the Bi 4f from Bi/BTOCB.

|                     | Peak 1   | Peak 2   | Peak 3   | Peak 4   |
|---------------------|----------|----------|----------|----------|
| Binding Energy (eV) | 164.44   | 163.29   | 159.13   | 157.95   |
| Peak areas (a.u.)   | 135924.7 | 2787.026 | 174563.7 | 10251.96 |

**Table S3.** The rate constants  $k$  ( $\text{min}^{-1}$ ) for TC degradation over the as-prepared samples.

| Samples  | Piezocatalysis | Photocatalysis | Piezo-photocatalysis |
|----------|----------------|----------------|----------------------|
| BTOC     | 0.0038         | 0.0188         | 0.0262               |
| BTOCB    | 0.0026         | 0.0265         | 0.0347               |
| BTOB     | 0.0019         | 0.0057         | 0.0082               |
| Bi/BTOCB | 0.0030         | 0.0381         | 0.0487               |

**Table S4.** Intermediates information in piezo-photocatalytic degradation of TC over Bi/BTOCB homologous Schottky junction.

| No.       | m/z | Molecular formula       | Proposed Structure                                                                                                                                                         |
|-----------|-----|-------------------------|----------------------------------------------------------------------------------------------------------------------------------------------------------------------------|
| <b>TC</b> | 445 | $C_{22}H_{24}N_2O_8$    | 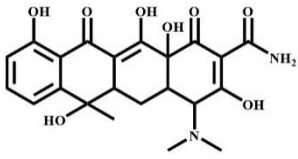      |
| <b>P1</b> | 475 | $C_{22}H_{22}N_2O_{10}$ |       |
| <b>P2</b> | 419 | $C_{20}H_{22}N_2O_8$    |     |
| <b>P3</b> | 429 | $C_{20}H_{20}N_2O_9$    |   |
| <b>P4</b> | 410 | $C_{22}H_{24}N_2O_7$    |   |
| <b>P5</b> | 376 | $C_{19}H_{21}NO_7$      |   |
| <b>P6</b> | 449 | $C_{21}H_{24}N_2O_9$    |   |
| <b>P7</b> | 371 | $C_{18}H_{10}O_9$       |   |

|            |     |                   |                                                                                   |                                                                                     |
|------------|-----|-------------------|-----------------------------------------------------------------------------------|-------------------------------------------------------------------------------------|
| <b>P8</b>  | 353 | $C_{19}H_{12}O_7$ | 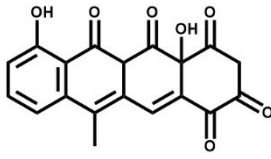 |  |
| <b>P9</b>  | 149 | $C_{10}H_{12}O$   |  |  |
| <b>P10</b> | 107 | $C_7H_6O$         |  |  |
| <b>P11</b> | 89  | $C_5H_{12}O$      |  |  |
| <b>P12</b> | 223 | $C_6H_6O_9$       |  |  |

**Table S5.** Acute toxicological data of TC and its intermediates predicted by Toxicity Estimation Software Tool (T.E.S.T.).

| No.        | m/z | Fathead minnow LC <sub>50</sub> (96 hr)<br>mg/L | Daphnia magna LC <sub>50</sub> (48 hr)<br>mg/L |
|------------|-----|-------------------------------------------------|------------------------------------------------|
| <b>TC</b>  | 445 | 0.90                                            | 8.70                                           |
| <b>P1</b>  | 475 | 6.53                                            | 29.82                                          |
| <b>P2</b>  | 419 | 1.02                                            | 7.76                                           |
| <b>P3</b>  | 429 | 0.33                                            | 1.17                                           |
| <b>P4</b>  | 410 | 9.77E-02                                        | 1.22                                           |
| <b>P5</b>  | 376 | 2.74                                            | 3.05                                           |
| <b>P6</b>  | 449 | 3.53                                            | 15.12                                          |
| <b>P7</b>  | 371 | 8.39E-02                                        | 7.27                                           |
| <b>P8</b>  | 353 | 0.51                                            | 13.07                                          |
| <b>P9</b>  | 149 | 6.81                                            | 9.70                                           |
| <b>P10</b> | 107 | 13.87                                           | 15.90                                          |
| <b>P11</b> | 89  | 989.89                                          | 1444.12                                        |
| <b>P12</b> | 223 | 578.04                                          | 607.38                                         |

**Table S6.** Developmental toxicity and Mutagenicity data of TC and its intermediates predicted by Toxicity Estimation Software Tool (T.E.S.T.).

| No.        | m/z | Developmental Toxicity |                            | Mutagenicity |          |
|------------|-----|------------------------|----------------------------|--------------|----------|
|            |     | Value                  | Result                     | Value        | Result   |
| <b>TC</b>  | 445 | 0.89                   | Developmental toxicant     | 0.56         | Positive |
| <b>P1</b>  | 475 | 0.91                   | Developmental toxicant     | 0.59         | Positive |
| <b>P2</b>  | 419 | 0.89                   | Developmental toxicant     | 0.65         | Positive |
| <b>P3</b>  | 429 | 0.88                   | Developmental toxicant     | 0.78         | Positive |
| <b>P4</b>  | 410 | 0.91                   | Developmental toxicant     | 0.44         | Negative |
| <b>P5</b>  | 376 | 0.82                   | Developmental toxicant     | 0.64         | Positive |
| <b>P6</b>  | 449 | 0.82                   | Developmental toxicant     | 0.51         | Positive |
| <b>P7</b>  | 371 | 0.83                   | Developmental toxicant     | 0.62         | Positive |
| <b>P8</b>  | 353 | 0.98                   | Developmental toxicant     | 0.56         | Positive |
| <b>P9</b>  | 149 | 0.55                   | Developmental toxicant     | 0.08         | Negative |
| <b>P10</b> | 107 | 0.15                   | Developmental NON-toxicant | -0.04        | Negative |
| <b>P11</b> | 89  | 0.54                   | Developmental toxicant     | 0.35         | Negative |
| <b>P12</b> | 223 | 0.37                   | Developmental NON-toxicant | 0.2          | Negative |
